# Supplementary material
Source: publisher site journal article supplement (https://www.dovepress.com/article/551944)
Supplement: Supplementary file 1 [file 551944%20Revised%20Supplementary%20Material.docx]

**Supplementary Material**

Supplementary Table S1. The comparison of characteristics in patients with OSA classified by COPD group, asthma group and COPD & asthma group

|  | COPD  (n=130) | Asthma  (n=191) | COPD & asthma (n=113) | *P* value  1 vs 2 | *P* value  1 vs 3 | *P* value  2 vs 3 | *P* value  among  groups |
| --- | --- | --- | --- | --- | --- | --- | --- |
| **Demographic and clinical characteristics** | | | | | | | |
| Age, years | 58.0  (50.5, 68.0) | 49.0  (38.0, 56.0) | 60.0  (51.0, 67.0) | <0.001 | 0.701 | <0.001 | <0.001 |
| BMI, kg/m2 | 26.2  (23.5, 28.0) | 26.9  (24.4, 29.9) | 26.1  (23.7, 29.2) | 0.003 | 0.238 | 0.106 | 0.009 |
| NC, cm | 38.0  (35.0, 40.0) | 38.0  (35.0, 41.0) | 38.0  (36.0, 40.3) | 0.633 | 0.512 | 0.859 | 0.806 |
| WC, cm | 96.0  (88.0, 101.5) | 95.0  (87.0, 103.0) | 95.0  (88.0, 100.5) | 0.975 | 0.672 | 0.655 | 0.887 |
| Male, n (%) | 114 (87.7%) | 129 (67.5%) | 93 (82.3%) | <0.001 | 0.238 | 0.005 | <0.001 |
| Smoking, n (%) | 47 (36.2%) | 43 (22.5%) | 30 (26.5%) | 0.008 | 0.108 | 0.426 | 0.026 |
| Alcohol consumption, n (%) | 36 (27.7%) | 49 (25.7%) | 24 (21.2%) | 0.685 | 0.245 | 0.384 | 0.499 |
| Rhinitis | 52 (40.0%) | 96 (50.3%) | 62 (54.9%) | 0.070 | 0.021 | 0.437 | 0.054 |
| **PSG parameters** | | | | | | | |
| AHI, events/h | 21.5  (10.0, 42.2) | 22.0  (11.9, 36.2) | 16.4  (10.4, 28.3) | 0.901 | 0.142 | 0.044 | 0.132 |
| ODI, events/h | 18.9  (10.1, 41.8) | 22.7  (12.4, 39.7) | 19.4  (10.3, 37.0) | 0.408 | 0.829 | 0.257 | 0.489 |
| T90%, min | 18.5  (2.0, 75.5) | 8.3  (2.5, 30.2) | 17.3  (2.4, 96.3) | 0.097 | 0.734 | 0.057 | 0.098 |
| WASO, min | 63.0  (29.0, 105.0) | 47.5  (22.5, 94.5) | 69.5  (44.5, 105.0) | 0.072 | 0.125 | <0.001 | 0.003 |
| MAI, events/h | 15.7  (9.3, 31.4) | 16.4  (10.1, 25.5) | 16.2  (9.8, 22.7) | 0.809 | 0.569 | 0.559 | 0.796 |
| MSpO2, % | 94.0  (92.0, 95.0) | 94.0  (93.0, 95.0) | 93.0  (91.0, 95.0) | 0.105 | 0.214 | 0.004 | 0.013 |
| Min. SpO2, % | 82.0  (74.0, 86.0) | 81.0  (75.5, 86.0) | 82.0  (77.0, 86.0) | 0.865 | 0.497 | 0.477 | 0.729 |
| TST, min | 414.0  (371.0, 455.1) | 404.0  (355.5, 454.8) | 404.8  (348.5, 449.0) | 0.724 | 0.332 | 0.463 | 0.607 |
| Sleep efficiency, % | 86.7  (77.0, 92.3) | 88.4  (79.1, 94.3) | 85.3  (78.2, 91.9) | 0.195 | 0.628 | 0.065 | 0.152 |
| N1, % | 19.1  (13.0, 31.6) | 13.9  (7.8. 27.7) | 18.0  (11.1, 28.8) | <0.001 | 0.263 | 0.040 | 0.002 |
| N2, % | 58.3  (42.3, 69.2) | 60.4  (45.05, 70.0) | 62.5  (50.9, 70.6) | 0.402 | 0.066 | 0.262 | 0.192 |
| N3, % | 1.4  (0.0, 7.6) | 5.3  (0.0, 10.5) | 0.0  (0.0, 6.0) | 0.006 | 0.136 | <0.001 | <0.001 |
| REM, % | 15.0  (10.9, 19.2) | 15.1  (10.6, 20.1) | 14.2  (9.0, 18.8) | 0.693 | 0.341 | 0.180 | 0.390 |
| F(hypopnea), % | 57.8  (25.3, 84.5) | 72.8  (47.5, 89.7) | 78.0  (56.6, 89.8) | 0.008 | 0.001 | 0.331 | 0.003 |
| AT Score | 13.6  (8.4, 21.8) | 14.2  (10.4, 20.2) | 10.7  (7.2, 17.3) | 0.483 | 0.046 | 0.007 | 0.025 |

Values were expressed as median (interquartile range in brackets) or count (percentage). Group 1: COPD group; Group 2: asthma group; Group 3: COPD & asthma group; AT: arousal threshold; BMI: body mass index; NC: neck circumstance; WC: waist circumstance; PSG: polysomnography; AHI, apnea-hypopnea index; ODI: oxygen desaturation index; T90%: cumulative percentages of time spent at arterial oxygen saturation below 90%; MSpO2: mean pulse oxygen saturation; min. SpO2: minimum arterial oxygen saturation; WASO: wake after sleep onset; MAI: microarousal index; TST: total sleep time; N1%, N2%, N3%, REM%: the percentage of stage 1, 2, 3 and rapid eye movement sleep in total sleep time; Fhypopnea: fraction of the respiratory events that were hypopnea; COPD: chronic obstructive pulmonary disease

Supplementary Table S2. Odds ratio and 95% confidence interval of low arousal threshold for chronic cough, COPD and asthma, based on the subgroup analysis of gender

|  | Unadjusted OR  (95% CI) | *P*  value | Adjusted OR (95% CI)  Model 1 | *P*  value | Adjusted OR (95% CI)  Model 2 | *P*  value |
| --- | --- | --- | --- | --- | --- | --- |
| **Male** | | | | | | |
| COPD | 2.46 (1.84-3.29) | <0.001 | 1.84 (1.29-2.61) | 0.001 | 1.42 (1.08-2.05)§ | 0.015 |
| Asthma | 2.26 (1.71-2.99) | <0.001 | 1.96 (1.42-2.71) | <0.001 | 1.89 (1.36-2.62)Ψ | <0.001 |
| **Female** | | | | | | |
| COPD | 2.01 (0.91-4.47) | 0.082 | 1.91 (0.76-4.78) | 0.168 | 1.33 (0.50-3.56)§ | 0.565 |
| Asthma | 2.51 (1.42-4.34) | 0.001 | 2.02 (1.06-3.85) | 0.034 | 2.04 (1.05-3.94)Ψ | 0.035 |

High arousal threshold group was considered as the reference. AT: arousal threshold; COPD: chronic obstructive pulmonary disease; Model 1: Adjusted for age, BMI, male%, smoking, alcohol consumption, ODI and T90%; Model 2§: Model 1 + asthma; Model 2Ψ: Model 1 + rhinitis

Supplementary Table S3. Odds ratio and 95% confidence interval of low arousal threshold for chronic cough, COPD and asthma, based on the subgroup analysis of age.

|  | Unadjusted OR  (95% CI) | *P*  value | Adjusted OR (95% CI)  Model 1 | *P*  value | Adjusted OR (95% CI)  Model 2 | *P*  value |
| --- | --- | --- | --- | --- | --- | --- |
| **Age < 60** | | | | | | |
| COPD | 1.86 (1.69-2.69) | 0.001 | 1.79 (1.16-2.77) | 0.009 | 1.55 (1.10-2.46)§ | 0.012 |
| Asthma | 1.89 (1.42-2.51) | <0.001 | 1.55 (1.11-2.16) | 0.011 | 1.50 (1.06-2.11)Ψ | 0.021 |
| **Age ≥ 60** | | | | | | |
| COPD | 2.24 (1.47-3.41) | <0.001 | 2.15 (1.31-3.53) | 0.002 | 1.29 (0.74-2.26)§ | 0.368 |
| Asthma | 4.13 (2.44-7.01) | <0.001 | 4.15 (2.27-7.56) | <0.001 | 4.02 (2.20-7.37)Ψ | <0.001 |

High arousal threshold group was considered as the reference. AT: arousal threshold; COPD: chronic obstructive pulmonary disease; Model 1: Adjusted for age, BMI, male%, smoking, alcohol consumption, ODI and T90%; Model 2§: Model 1 + asthma; Model 2Ψ: Model 1 + rhinitis

Supplementary Table S4. Odds ratio and 95% confidence interval of low arousal threshold for chronic cough, COPD and asthma, based on the subgroup analysis of BMI.

|  | Unadjusted OR  (95% CI) | *P*  value | Adjusted OR (95% CI)  Model 1 | *P*  value | Adjusted OR (95% CI)  Model 2 | *P*  value |
| --- | --- | --- | --- | --- | --- | --- |
| **BMI < 27** | | | | | | |
| COPD | 1.92 (1.33-2.76) | <0.001 | 1.88 (1.22-2.89) | 0.004 | 1.47 (1.02-2.33)§ | 0.046 |
| Asthma | 2.15 (1.51-3.07) | <0.001 | 1.93 (1.29-2.89) | 0.001 | 1.83 (1.21-2.75)Ψ | 0.004 |
| **BMI ≥ 27** | | | | | | |
| COPD | 2.24 (1.47-3.41) | <0.001 | 1.95 (1.19-3.19) | 0.008 | 1.42 (0.90-2.47)§ | 0.112 |
| Asthma | 4.13 (2.44-7.01) | <0.001 | 2.03 (1.36-3.03) | 0.001 | 2.03 (1.35-3.05)Ψ | <0.001 |

High arousal threshold group was considered as the reference. AT: arousal threshold; COPD: chronic obstructive pulmonary disease; Model 1: Adjusted for age, BMI, male%, smoking, alcohol consumption, ODI and T90%; Model 2§: Model 1 + asthma; Model 2Ψ: Model 1 + rhinitis

Supplementary Table S5. Odds ratio and 95% confidence interval of different levels of AT score for chronic cough, COPD and asthma, based on the subgroup analysis of gender.

|  | AT score | | | | | |
| --- | --- | --- | --- | --- | --- | --- |
| Male | | | Female | | |
| Low | High | Very high | Low | Moderate | High |
| **Model 1** | | | | | | |
| COPD | **3.90**** (1.84-8.12) | **2.52**** (1.27-5.02) | Ref | 1.58  (0.26-9.73) | 1.24  (0.23-6.81) | Ref |
| Asthma | **4.12**** (2.22-7.62) | **2.27**** (1.28-4.03) | Ref | **12.03*** (1.45-108.8) | **6.58***  (1.23-55.2) | Ref |
| **Model 2** | | | | | | |
| COPD§ | **2.30***  (1.09-4.82) | **1.97***  (1.02-3.93) | Ref | 0.60  (0.09-3.90) | 0.69  (0.12-3.89) | Ref |
| AsthmaΨ | **3.85****  (2.06-7.18) | **2.19****  (1.23-3.91) | Ref | **12.24***  (1.27-117.6) | **6.67***  (1.10-58.9) | Ref |

Very high AT score and high AHI were considered as the reference. AT: arousal threshold; AHI: apnea hypopnea index; COPD: chronic obstructive pulmonary disease; Ref: reference; Model 1: Adjusted for age, BMI, male%, smoking, alcohol consumption, ODI and T90%; Model 2§: Model 1 + asthma; Model 2Ψ: Model 1 + rhinitis; Bold font indicate statistical significance, * indicated *P* value < 0.05, and ** indicated *P* value < 0.01.

Supplementary Table S6. Odds ratio and 95% confidence interval of different levels of AT score for chronic cough, COPD and asthma, based on the subgroup analysis of age.

|  | AT score | | | | | |
| --- | --- | --- | --- | --- | --- | --- |
| Age < 60 | | | Age ≥ 60 | | |
| Low | High | Very high | Low | Moderate | High |
| **Model 1** | | | | | | |
| COPD | **4.72**** (1.96-11.4) | **3.68**** (1.66-8.17) | Ref | 2.39  (0.79-7.27) | 1.09  (0.36-3.28) | Ref |
| Asthma | **3.94**** (2.07-7.49) | **2.47**** (1.37-4.44) | Ref | **17.03****  (2.03-142.5) | **6.1***  (1.14-50.3) | Ref |
| **Model 2** | | | | | | |
| COPD§ | **2.78***  (1.16-6.62) | **2.66***  (1.21-5.88) | Ref | 1.05  (0.33-3.38) | 0.72  (0.23-2.25) | Ref |
| AsthmaΨ | **3.71****  (1.92-7.17) | **2.39****  (1.32-4.35) | Ref | **16.99***  (2.01-144.0) | **6.28***  (1.05-52.0) | Ref |

Very high AT score and high AHI were considered as the reference. AT: arousal threshold; AHI: apnea hypopnea index; COPD: chronic obstructive pulmonary disease; Ref: reference; Model 1: Adjusted for age, BMI, male%, smoking, alcohol consumption, ODI and T90%; Model 2§: Model 1 + asthma; Model 2Ψ: Model 1 + rhinitis; Bold font indicate statistical significance, * indicated *P* value < 0.05, and ** indicated *P* value < 0.01.

Supplementary Table S7. Odds ratio and 95% confidence interval of different levels of AT score for chronic cough, COPD and asthma, based on the subgroup analysis of BMI.

|  | AT score | | | | | |
| --- | --- | --- | --- | --- | --- | --- |
| BMI < 27 | | | BMI ≥ 27 | | |
| Low | High | Very high | Low | Moderate | High |
| **Model 1** | | | | | | |
| COPD | **3.90*** (1.25-12.1) | 2.25  (0.74-6.88) | Ref | **3.29**** (1.37-7.90) | **2.31*** (1.05-5.10) | Ref |
| Asthma | **3.73**** (1.45-9.61) | 1.86  (0.74-4.66) | Ref | **4.29**** (2.07-8.91) | **2.44*** (1.24-4.77) | Ref |
| **Model 2** | | | | | | |
| COPD§ | **2.86***  (1.06-9.15) | 2.17  (0.69-6.79) | Ref | 1.72  (0.69-4.30) | 1.62  (0.71-3.67) | Ref |
| AsthmaΨ | **3.30***  (1.26-8.62) | 1.70  (0.67-4.29) | Ref | **4.13****  (1.97-8.67) | **2.40***  (1.22-4.73) | Ref |

Very high AT score and high AHI were considered as the reference. AT: arousal threshold; AHI: apnea hypopnea index; COPD: chronic obstructive pulmonary disease; Ref: reference; Model 1: Adjusted for age, BMI, male%, smoking, alcohol consumption, ODI and T90%; Model 2§: Model 1 + asthma; Model 2Ψ: Model 1 + rhinitis; Bold font indicate statistical significance, * indicated *P* value < 0.05, and ** indicated *P* value < 0.01.
